# Supplementary material for: Construction and performance of a simple and efficient g-C3N4 photocatalytic hydrogen production system
Source: Royal Society of Chemistry journal article supplement (doi:10.1039/d1ra06436c), 2021-01-01
Supplement: d1ra06436c1.pdf [file d1ra06436c1.pdf]

## Supporting information

**Table S1.** A representative summary of the enhanced photocatalytic activity of g-C<sub>3</sub>N<sub>4</sub> photocatalysts based on sodium ion treatment for water splitting.

| Precursors                                        | Approach                      | Sacrificial and agentcatalysts     | Light source                                                               | Activity (unit)                                                                                                         | ref |
|---------------------------------------------------|-------------------------------|------------------------------------|----------------------------------------------------------------------------|-------------------------------------------------------------------------------------------------------------------------|-----|
| Melamine and disodium ethylenediaminetetraacetate | Generalthermal condensation   | Triethanolamine and Pt             | 300 W Xe lamp equipped with a UV-cutoff filter ( $\lambda > 420$ nm)       | H <sub>2</sub> ; 258.4 $\mu\text{mol h}^{-1}\text{g}^{-1}$                                                              | 1   |
| Melamine and sodium tripolyphosphate              | Generalthermal condensation   | Methanol and Pt                    | 350 W Xe arc lamp                                                          | H <sub>2</sub> ; 3820 $\mu\text{mol h}^{-1}\text{g}^{-1}$                                                               | 2   |
| Melamine and sodium hydroxide                     | Step calcination              | Triethanolamine and Pt             | 350 W Xe lamp with a UV cutoff filter ( $\lambda > 400$ nm)                | H <sub>2</sub> ; 935 $\mu\text{mol h}^{-1}\text{g}^{-1}$                                                                | 3   |
| Melamine and sodium borohydride                   | Step calcination              | Silver nitrate<br>Cobalt Hydroxide | 300 W Xe lamp with a UV cutoff filter ( $\lambda > 300$ nm)                | O <sub>2</sub> ; 561.2 $\mu\text{mol h}^{-1}\text{g}^{-1}$                                                              | 4   |
| Triazole ring and sodium hydroxide                | Condensation reaction         | -                                  | 50 W halogen tungsten lamp irradiation                                     | Degradation of methylene blue ; the maximum monolayer adsorption capacity 35mg/g                                        | 5   |
| Dicyandiamide and sodium hydroxide                | Hydrothermal treatment        | hydrogen peroxide                  | 350 W Xe lamp with a UV cutoff filter ( $\lambda > 420$ nm)                | The photocatalytic oxidation (PCO) of NO ; Promote three times                                                          | 6   |
| Melamine and sodium chloride                      | Ground in planetary ball mill | Pt                                 | 300 W xenon lamp with a 420 nm cutoff filter                               | H <sub>2</sub> and O <sub>2</sub> ; 31.5 $\mu\text{mol h}^{-1}\text{g}^{-1}$ , 15.2 $\mu\text{mol h}^{-1}\text{g}^{-1}$ | 7   |
| Melamine and potassium chloride-sodium chloride   | Molten salt method            | -                                  | 250 W high-pressure sodium lamp with main emission from 400 to 800 nm      | H <sub>2</sub> O <sub>2</sub> ; 4.6 mmol L <sup>-1</sup>                                                                | 8   |
| Melamine and potassium chloride-sodium chloride   | Molten salt method            | -                                  | 250 W high-pressure sodium lamp with main emission in the range of 400-800 | Degradation of rhodamine B ; RhB degradation rate at 90%                                                                | 9   |

|                               |                              |                 |                                                                               |                                                                                                                         |    |
|-------------------------------|------------------------------|-----------------|-------------------------------------------------------------------------------|-------------------------------------------------------------------------------------------------------------------------|----|
| Urea and sodium hydroxide     | High temperature calcination | Methanol and Pt | 250 W high-pressure sodium lamp (400 <math>< \lambda < 800 \text{ nm}</math>) | H <sub>2</sub> and H <sub>2</sub> O <sub>2</sub> ; 900 $\mu\text{mol h}^{-1}\text{g}^{-1}$ , 800 $\mu\text{mol g}^{-1}$ | 10 |
| Melamine and sodium hydroxide | Thermal polymerization       | -               | 300 W xenon lamp with a 420 nm cutoff filter                                  | Tetracycline degradation ; the photocatalytic degradation efficiency is 80.61%                                          | 11 |

1□Y. Zhang, S. Zong, C. Cheng, J. Shi, X. Guan, Y. Lu and L. Guo, *Int. J. Hydrogen Energy*, 2018, **43**, 13953-13961.

2□S. Cao, Q. Huang, B. Zhu and J. Yu, *J. Power Sources*, 2017, **351**, 151-159.

3□J. Jiang, S. Cao, C. Hu and C. Chen, *Chinese J. Catal.*, 2017, **38**, 1981-1989.

4□D. Zhao, C. L. Dong, B. Wang, C. Chen, Y. C. Huang, Z. Diao, S. Li, L. Guo, S. Shen, *Adv. Mater.*, 2019, **31**, 935-943.

5□H. Wang, M. Li, H. Li, Q. Lu, Y. Zhang and S. Yao, *Mater. Des.*, 2019, **162**, 210-218.

6□H. Nie, M. Ou, Q. Zhong, S. Zhang and L. Yu, *J. Hazard. Mater.*, 2015, **300**, 598-606.

7□F. Guo, J. Chen, M. Zhang, B. Gao, B. Lin and Y. Chen, *J. Mater. Chem. A*, 2016, **4**, 10806-10809.

8□X. Qu, S. Hu, J. Bai, P. Li, G. Lu and X. Kang, *J. Mater. Sci.*, 2018, **34**, 1932-1938.

9□J. Zhao, L. Ma, H. Wang, Y. Zhao, J. Zhang and S. Hu, *Appl. Surf. Sci.*, 2015, **332**, 625-630.

10□F. Liang, X. Sun, S. Hu, H. Ma, F. Wang and G. Wu, *Diam Relat Mater*, 2020, **108**, 107911.

11□W. Wang, P. Xu, M. Chen, G. Zeng, C. Zhang, C. Zhou, Y. Yang, D. Huang, C. Lai, M. Cheng, L. Hu, W. Xiong, H. Guo and M. Zhou, *ACS Sustain. Chem. Eng.*, 2018, **6**, 15503-15516.

The N<sub>2</sub> adsorption and desorption isotherms of the catalyst after solution regulation are shown in the figure S1. All samples show type IV adsorption-desorption isotherms with H<sub>3</sub> hysteresis ring, indicating that the existence of mesoporous structure is the result of the accumulation of flake particles.

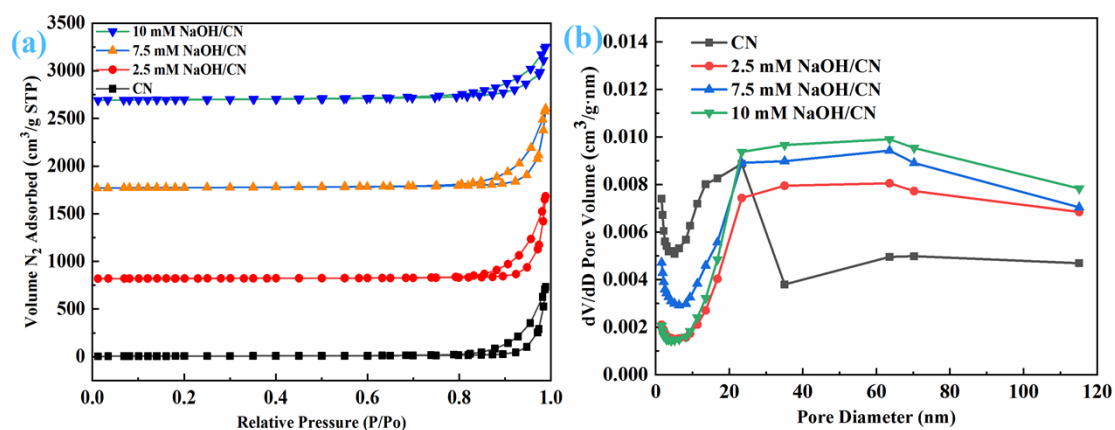

**Fig. S1** (a) Nitrogen adsorption-desorption isotherms of CN, 2.5 mM NaOH/CN, 7.5 mM NaOH/CN and 10 mM NaOH/CN; (b) The pore size distribution of CN, 2.5 mM NaOH/CN, 7.5 mM NaOH/CN and 10 mM NaOH/CN.

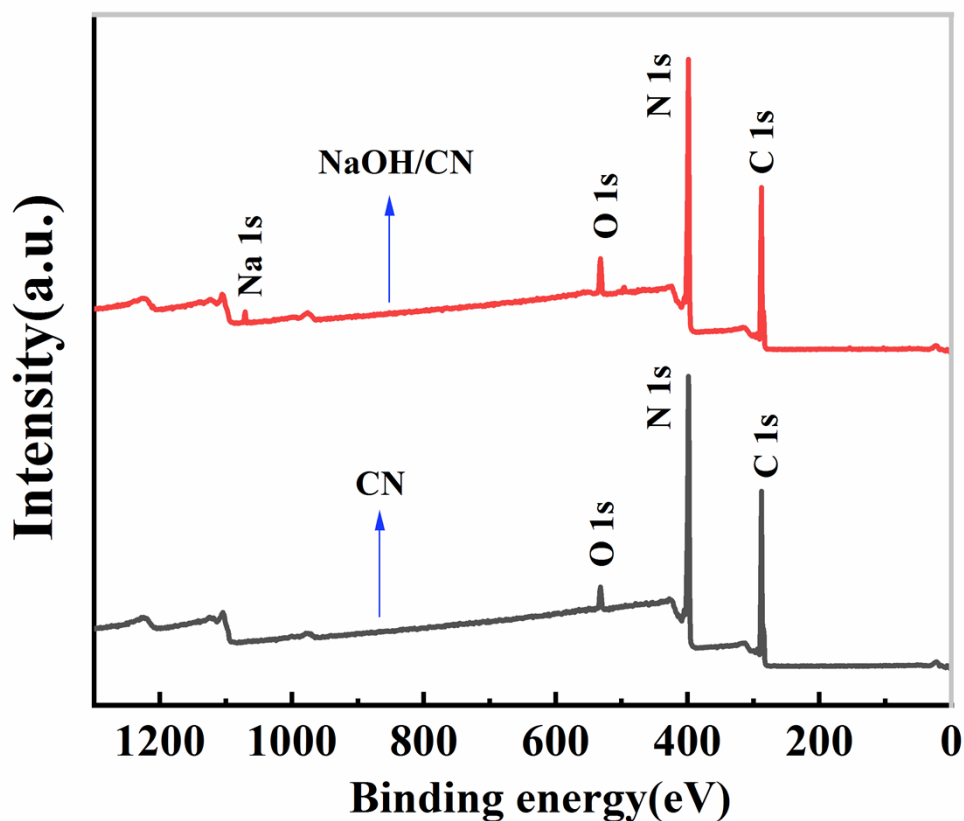

g. S2 XPS fully scanned spectrum of CN and 7.5 mM NaOH/CN.

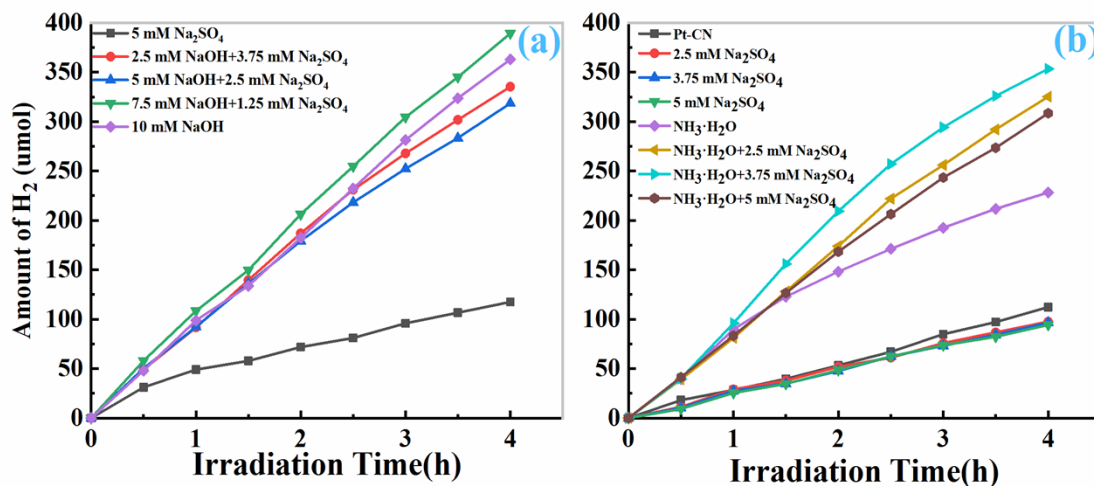

Fig. S3 (a) The time courses of H<sub>2</sub> evolution at different pH and (b) the H<sub>2</sub> production of different Na<sup>+</sup> concentration.

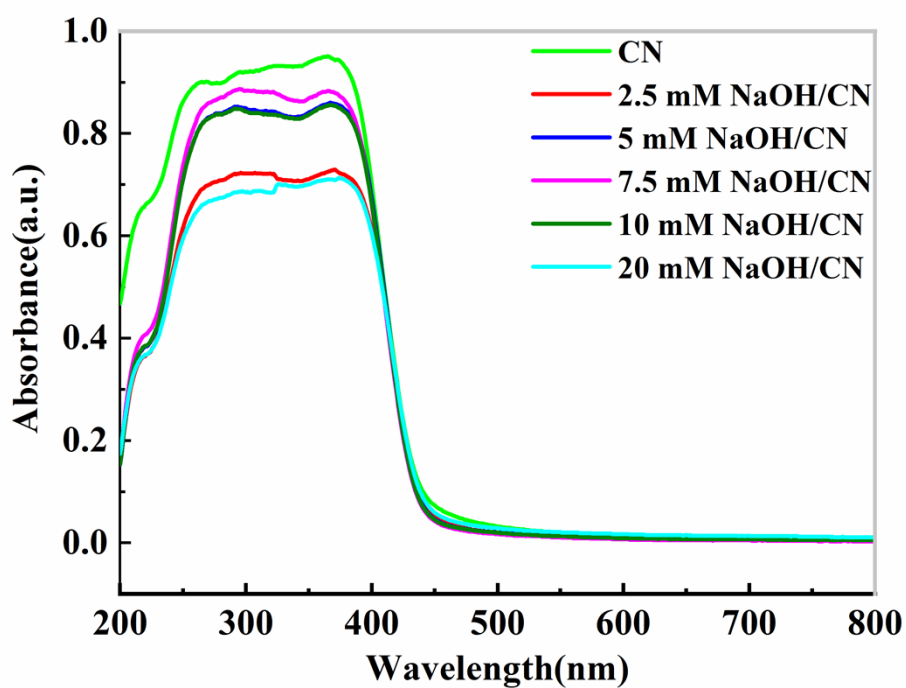

Fig. S4 UV-vis DRS patterns of CN and (NaOH)<sub>x</sub>/CN (n = 2.5, 5, 7.5, 10, 20 mM)
